# Supplementary material for: Ammonia-assisted synthesis of low-crystalline FeCo hydroxides for efficient electrochemical overall water splitting
Source: Royal Society of Chemistry journal article supplement (doi:10.1039/d3nr01574b), 2023-01-01
Supplement: d3nr01574b1.pdf [file d3nr01574b1.pdf]

## Electronic Supporting Information

### **Ammonia-Assisted Synthesis of low-crystalline FeCo Hydroxides for Efficient Electrochemical Overall Water Splitting**

Huijun Ren,<sup>a†</sup> Changgen Cheng,<sup>a†</sup> Peiqun Yin,<sup>b\*</sup> Qing Qin,<sup>c\*</sup> and Lei Dai<sup>a\*</sup>

<sup>a</sup> Key Laboratory for Special Functional Materials of Ministry of Education, School of Materials Science and Engineering, Henan University, Kaifeng 475004, China.

\*E-mail: dailei@henu.edu.cn (L.Dai)

<sup>b</sup> Centerl of Biomedical Materials Research and Engineering, School of Biomedical Engineering, Anhui Medical University, Hefei, 230032, China.

\*E-mail: pqyin@mail.ustc.edu.cn (P.Yin)

<sup>c</sup> Key Laboratory of Functional Molecular Solids, Ministry of Education, College of Chemistry and Materials Science, Anhui Normal University, Wuhu 241002, China.

\*E-mail: qing.qin@ahnu.edu.cn (Q.Qin).

† These authors contributed equally to this work.

\* Corresponding author.

## Experimental Procedures

### Materials.

CoCl<sub>2</sub>, FeCl<sub>3</sub>, ammonia (37%) and KOH were purchased from Sigma-Aldrich. All of these chemicals used in this experiment without further purification. The Milli-Q water used in all experiments with a resistivity of 18.2 MΩ cm was prepared using a Milli-Q water system.

### Preparation of low-crystalline FeCo Hydroxides.

In a typical experiment, 1.0 mol of CoCl<sub>2</sub>, 1.0 mol of FeCl<sub>3</sub> was dissolved in 500 ml of H<sub>2</sub>O with magnetic stirring, and then 30 mL ammonia (37%) was added in the solution stirring for 30 min. The final product was collected by centrifugation, washed with water for three times.

### Preparation of high-crystalline FeCo Hydroxides.

In a typical experiment, 500 mg of low-crystalline FeCo Hydroxides dissolved in 2 mL of water and 20 mL of DMF to form a homogeneous solution. After the mixture was sealed in a 30-ml pressure vessel, it was heated from room temperature to 140°C in 30 min and then kept at 140°C for 10 h in oven. The product was collected and rinsed three times with Milli-Q water.

### Preparation of Fe Hydroxides.

In a typical experiment, 1.0 mol of FeCl<sub>3</sub> was dissolved in 500 ml of H<sub>2</sub>O with magnetic stirring, and then 15 mL ammonia (37%) was added in the solution stirring for 30 min. The final product was collected by centrifugation, washed with water for three times.

### Preparation of Co Hydroxides.

In a typical experiment, 1.0 mol of CoCl<sub>2</sub> was dissolved in 300 ml of H<sub>2</sub>O with magnetic stirring, and then 15 mL ammonia (37%) was added in the solution stirring for 30 min. The final product was collected by centrifugation, washed with water for three times.

### Characterizations.

TEM was carried out on JEOL JEM-2100F microscope and JEM-2010. All samples were dispersed in ethanol and then dropped on Cu grids. X-ray diffraction (XRD) patterns were recorded with a Shimadzu XRD-6000. XPS data were acquired using a Kratos Axis Ultra XPS. All electrochemical measurements were carried out on a CHI 760e electrochemical workstation in a three-electrode configuration cell using as-prepared sample loading on carbon paper as the working electrode, where the active area was precisely controlled at 1 × 1 cm<sup>2</sup>, platinum plate (1 × 1 cm<sup>2</sup>) as the counter electrode, and saturated calomel electrode (SCE) as the reference electrode. In 1.0 M KOH,  $E(\text{RHE}) = E(\text{SCE}) + 0.2412 + \text{pH} \times 0.0592 = E(\text{SCE}) + 1.046$ . As for HER, overpotential = 0 V – E(RHE). As for OER, overpotential = E(RHE) – 1.23 V. All the electrolysis was conducted at room temperature and 80% IR correction was applied in all measurements.

## Results and Discussion

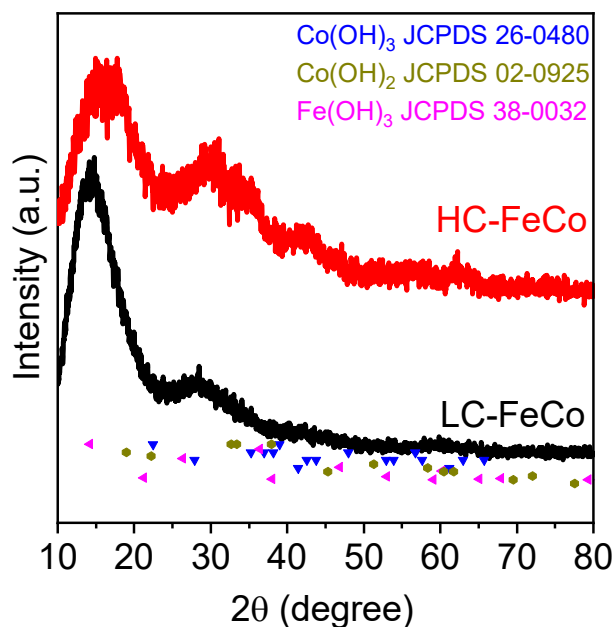

**Fig. S1** XRD patterns of the LC-FeCo and HC-FeCo.

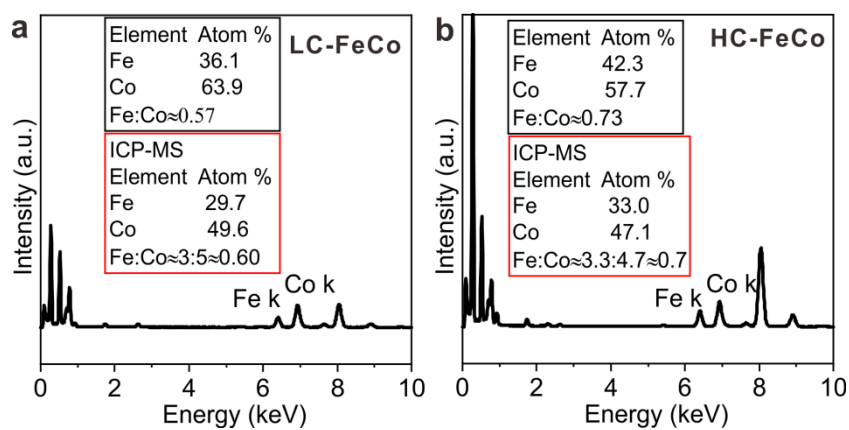

**Fig. S2** EDX spectrum of the (a) LC-FeCo and (b) HC-FeCo.

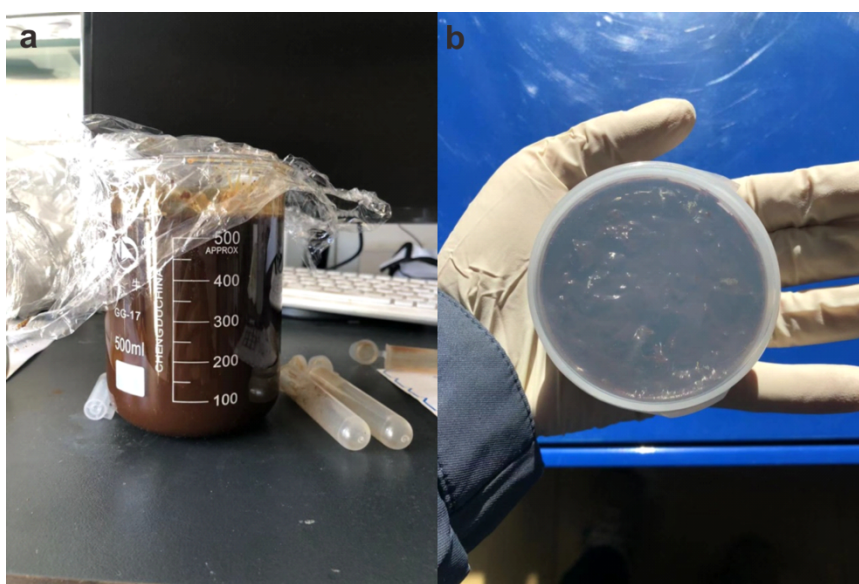

**Fig. S3** (a) Pictures of the reaction solution during the large-scale preparation and (b) pictures of the product after cleaning and centrifugation.

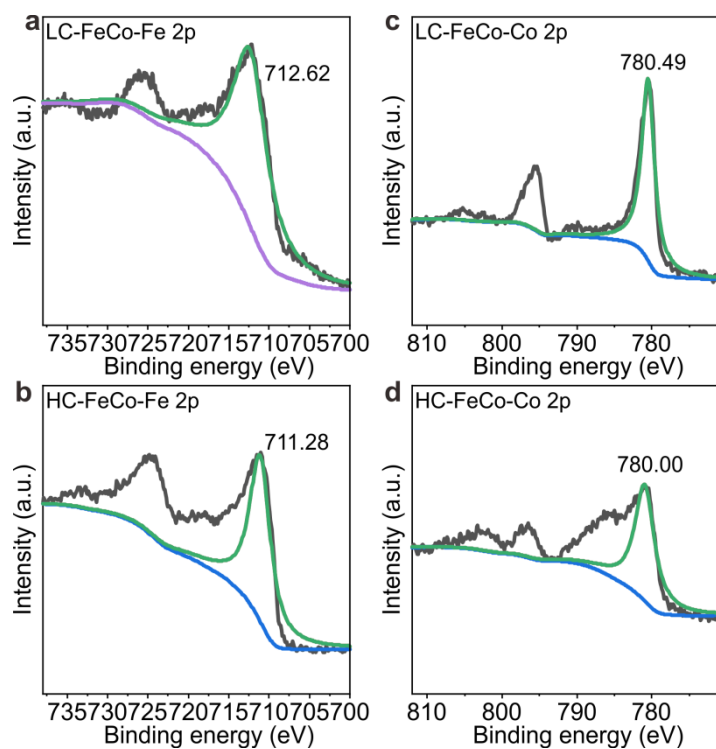

**Fig. S4** XPS spectra of the LC-FeCo and HC-FeCo. Fe 2p spectra in (a) LC-FeCo and (b) HC-FeCo, Co 2p spectra in (c) LC-FeCo and (d) HC-FeCo.

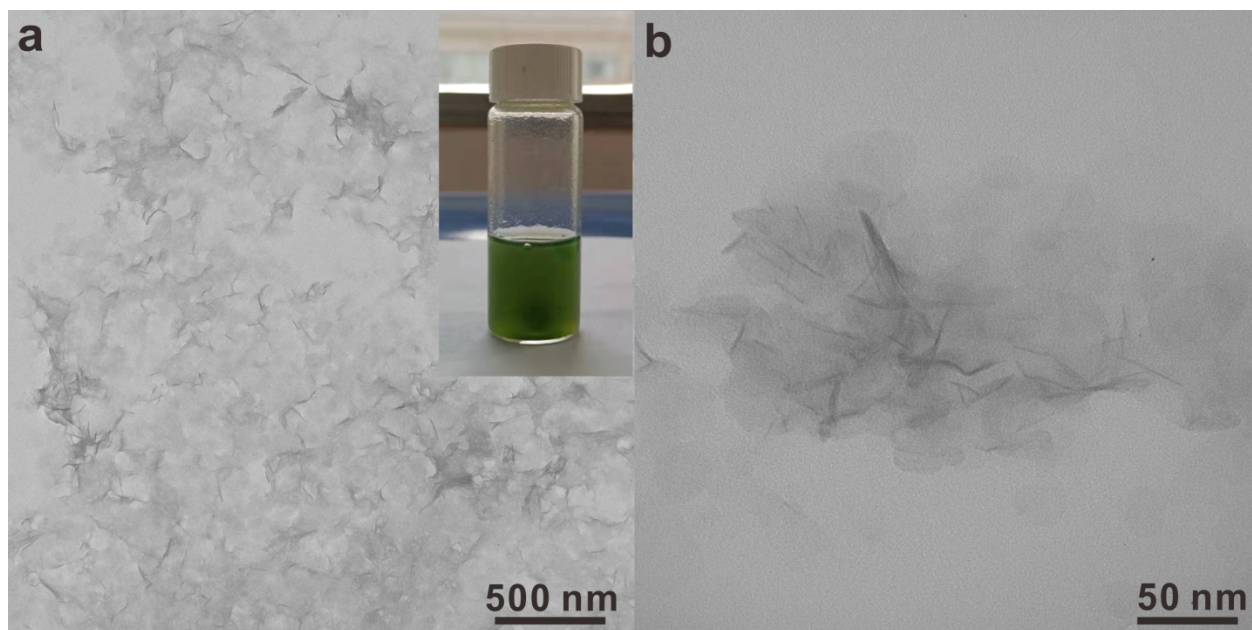

**Fig. S5** Low-magnification TEM images of Co nanosheets

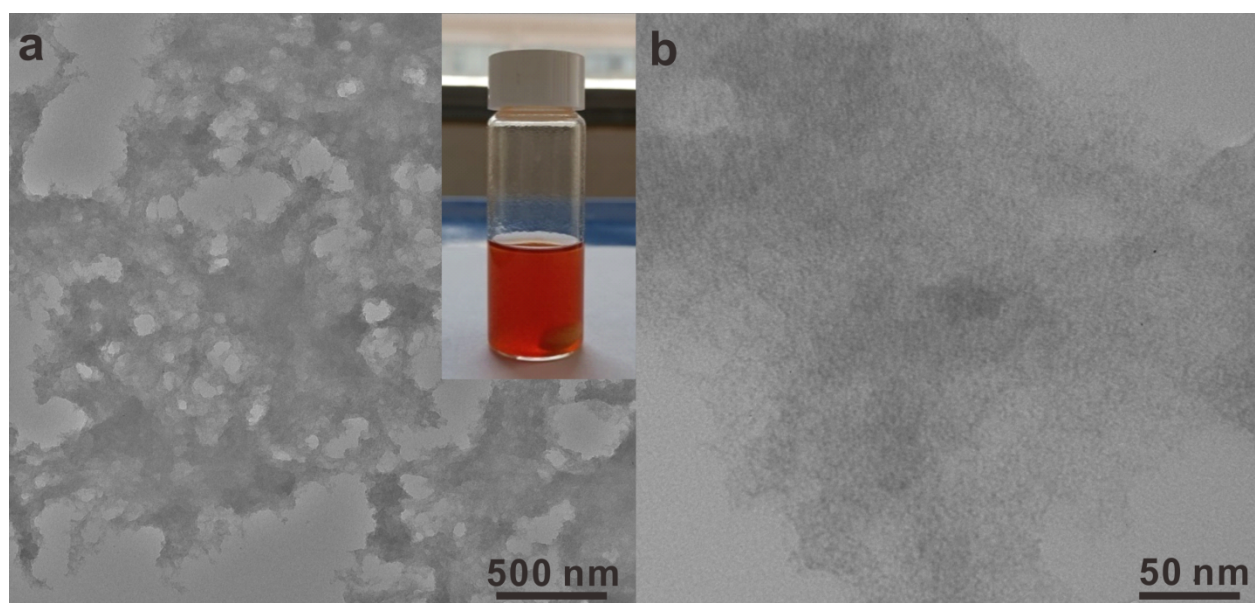

**Fig. S6** Low-magnification TEM images of Fe nanosheets.

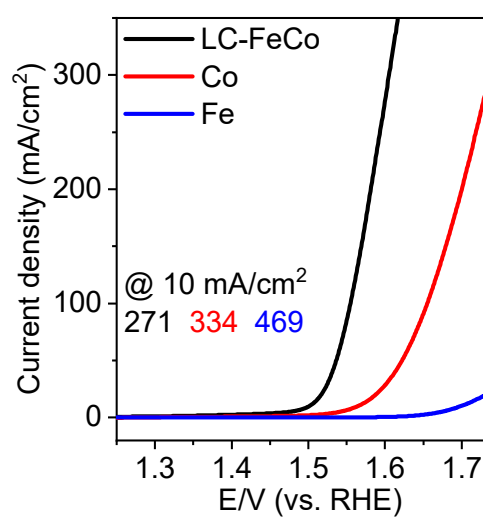

**Fig. S7** OER performances of LC-FeCo, Co and Fe in KOH. The polarization curves normalized by electrode surface area. The loading amounts of all catalysts on carbon paper are 1.0 mg/cm<sup>2</sup>.



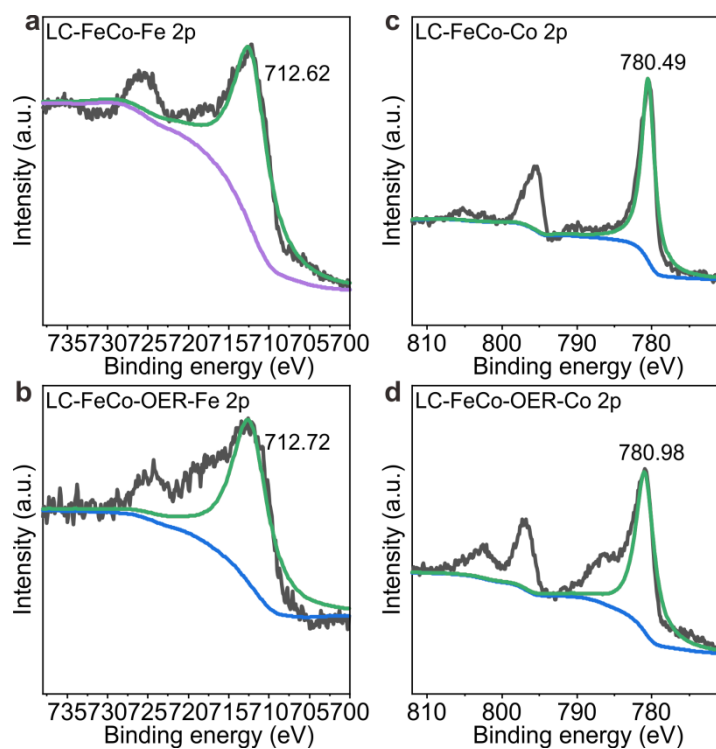

**Fig. S8** XPS spectra of the LC-FeCo. Fe 2p spectra in LC-FeCo (a) before and (b) after OER, Co 2p spectra in LC-FeCo (c) before and (d) after OER.

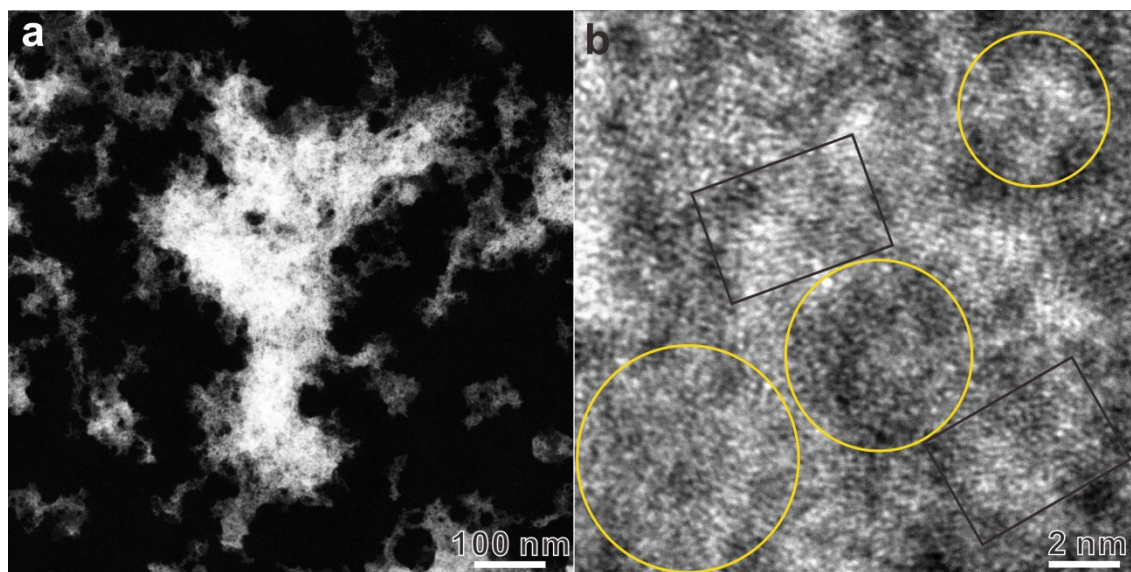

**Fig.S9** (a) STEM and (b) HR-TEM images of LC-FeCo after OER The circles and quadrilaterals in Figure B highlight the amorphous and crystalline regions of the material, respectively.

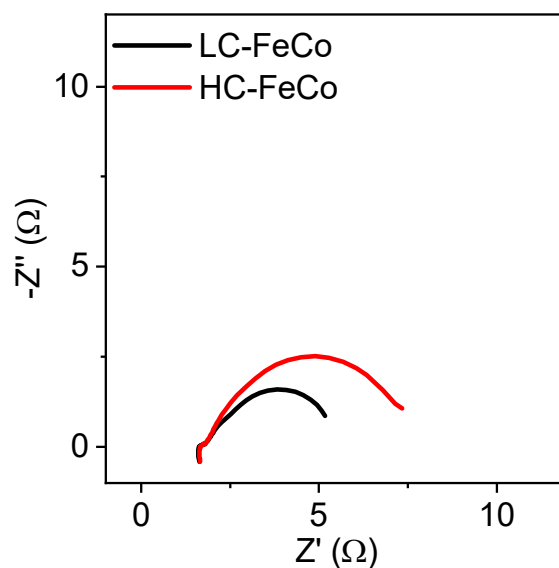

**Fig. S10** Nyquist plots of LC-FeCo and HC-FeCo under the potential of 0.4 V (vs. reversible hydrogen electrode (RHE)).  $Z'$  is the real impedance, and  $-Z''$  is the imaginary impedance. LC-FeCo exhibited superior electrical conductivity and ion transport kinetics over HC-FeCo. The electrochemical interface was modeled by an equivalent circuit containing total Ohmic resistance of the cell ( $R_{\Omega}$ ), charge-transfer resistance ( $R_{ct}$ ) and the double-layer capacitance ( $C_{dl}$ ). The loading amounts of all catalysts on carbon papers were 1.0 mg/cm<sup>2</sup>.

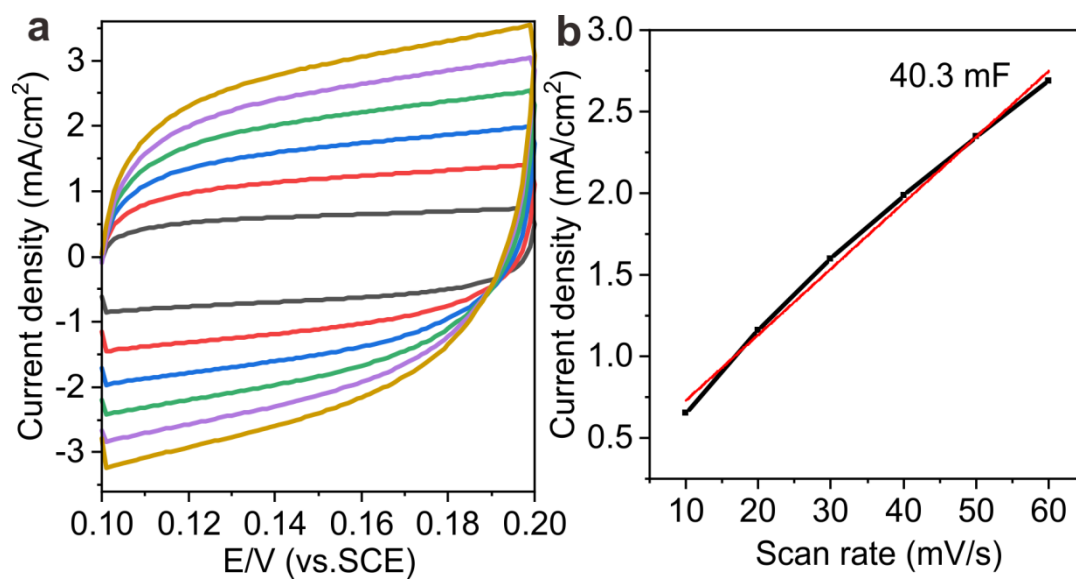

**Fig. S11** (a) Cyclic voltammetry at different rates (10–60 mV/s) between 0.1 to 0.2 V (vs. SCE) and (b) the electrochemical double-layer capacitance ( $C_{dl}$ ) value of LC-FeCo.

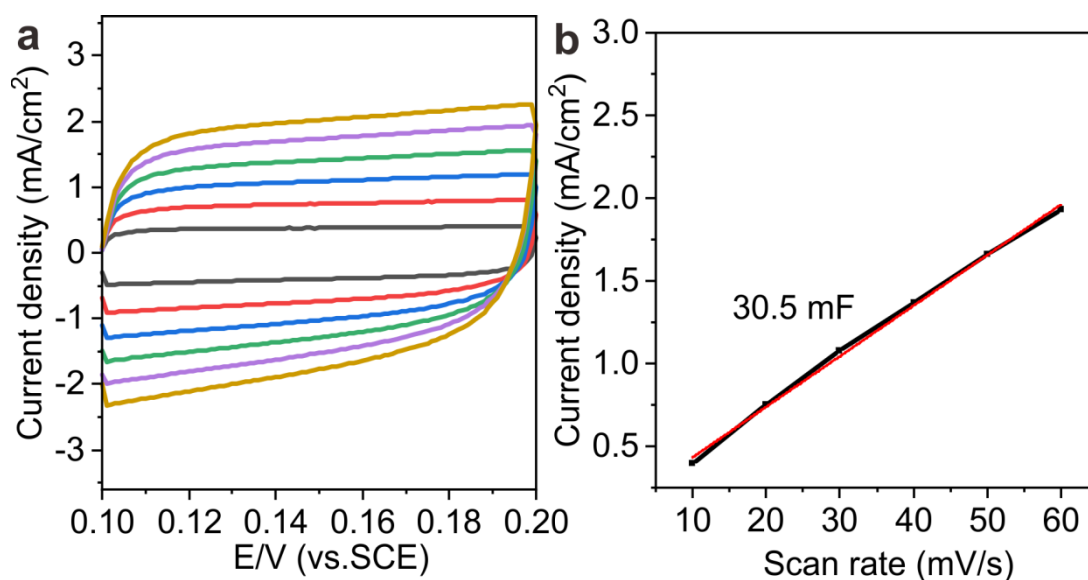

**Fig. S12** (a) Cyclic voltammetry at different rates (10–60 mV/s) between 0.1 to 0.2 V (vs. SCE) and (b) the electrochemical double-layer capacitance ( $C_{dl}$ ) value of HC-FeCo.

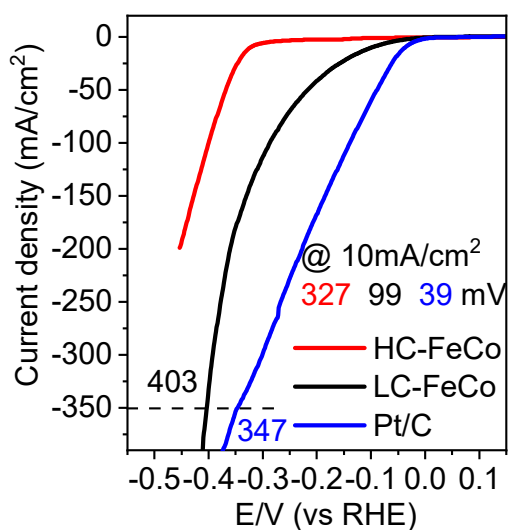

**Fig. S13** HER performances of LC-FeCo, HC-FeCo and Pt/C in KOH. The polarization curves normalized by electrode surface area. The loading amounts of all catalysts on carbon paper are 1.0 mg/cm<sup>2</sup>.



**Tab. S1** Comparison of recently reported FeCo-based nanomaterials used as electrocatalysts for OER.

| Catalysts                                              | Electrolyte | Overpotential<br>(mV)<br>@ 10 mA/cm <sup>2</sup> | Tafel<br>plots<br>(mV/dec) | Ref.                                                   |
|--------------------------------------------------------|-------------|--------------------------------------------------|----------------------------|--------------------------------------------------------|
| <b>LC-FeCo</b>                                         | 1.0 KOH     | <b>271</b>                                       | <b>51.6</b>                | <b>This work</b>                                       |
| Fe <sub>0.33</sub> Co <sub>0.67</sub> OOH<br>PNSAs/CFC | 1.0 KOH     | 266                                              | 30                         | Angew. Chem. Int.<br>Ed. 2018, 57, 2672                |
| Fe-CoOOH/G                                             | 1.0 KOH     | 330                                              | 37                         | Adv. Energy Mater.<br>2017, 1602148.                   |
| CoFe LDHs-Ar                                           | 1.0 KOH     | 266                                              | 37.85                      | Angew. Chem., Int.<br>Ed. 2017, 56, 5867.              |
| Co <sub>5</sub> /Fe-LDHs                               | 1.0 KOH     | 285                                              | 44.6                       | Inorg. Chem. 2021,<br>60, 5252                         |
| DH-CoFe LDHs                                           | 1.0 KOH     | 276                                              | 40.5                       | Sci. China Chem.,<br>2019, 62, 1365                    |
| Fe <sub>1</sub> Co <sub>1</sub> LDHs                   | 1.0 KOH     | 278                                              | 27                         | Nanoscale, 2019,<br>11, 10348–10357.                   |
| CoFe-H                                                 | 1.0 KOH     | 280                                              | 28                         | Adv. Funct. Mater.<br>2017, 27, 1603904                |
| Co-FeOOH/CFP                                           | 1.0 KOH     | 250                                              | 36                         | Small 2019, 15:<br>1901015.                            |
| FeCo-MOF-EH/NF                                         | 1.0 KOH     | 231                                              | 42                         | Angew. Chem. Int.<br>Ed. 2020, 59,<br>13101–13108      |
| $\alpha$ -Co <sub>4</sub> Fe(OH) <sub>x</sub>          | 1.0 KOH     | 295                                              | 52                         | J. Mater. Chem. A<br>2017, 5: 1078                     |
| CoFe LDH-F                                             | 1.0 KOH     | 300                                              | 40                         | ACS Appl. Mater.<br>Interfaces 2016, 8,<br>34474–34481 |

**Tab. S2** Detailed catalytic performance of the catalysts in our work.

| Catalytic Performances |                        | Catalyst    |             |                         |
|------------------------|------------------------|-------------|-------------|-------------------------|
|                        |                        | LC-FeCo     | HC-FeCo     | RuO <sub>2</sub> (Pt/C) |
| OER                    | 10 mA/cm <sup>2</sup>  | 271 mV      | 312 mV      | 342 mV                  |
|                        | 200 mA/cm <sup>2</sup> | 352 mV      | 434 mV      | --                      |
|                        | Tafe splos             | 51.6 mV/dec | 75.5 mV/dec | 145.8 mV/dec            |
| HER                    | 10 mA/cm <sup>2</sup>  | 99 mV       | 327 mV      | (39 mV)                 |
|                        | 350 mA/cm <sup>2</sup> | 403 mV      | --          | (347 mV)                |
| Water Splitting        | 10 mA/cm <sup>2</sup>  | 1.582 V     | --          | 1.622 V                 |
|                        | 200 mA/cm <sup>2</sup> | 1.951 V     | --          | 2.126 V                 |
